# Supplementary material
Source: PubMed Central journal article supplement (PMC4675454)

**Supplementary Figure S1.** Scatter plot of mutation count and copy number alterations in 83 upper tract urothelial carcinoma tumors profiled with MSK-IMPACT. Ultra-mutated case (422 somatic mutations) highlighted in red.

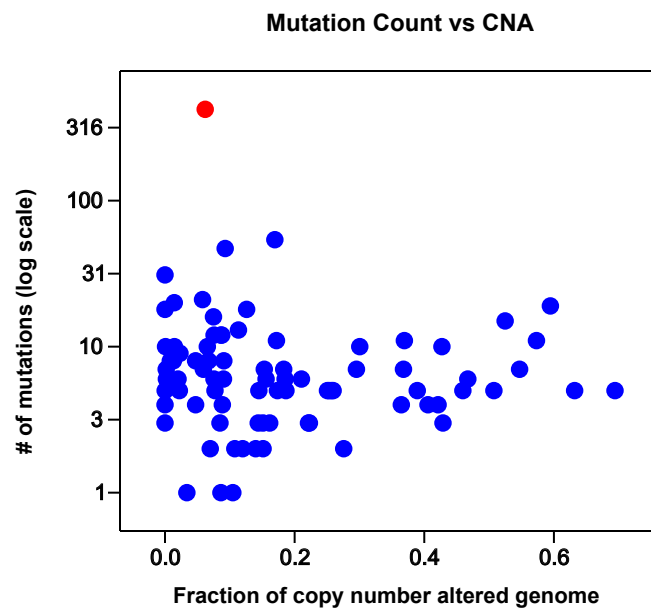

Supplement: NIHMS711446-supplement-1.pdf [file NIHMS711446-supplement-1.pdf]
