# Supplementary material
Source: PubMed Central journal article supplement (PMC4675454)

**Supplementary Figure S2.** (A) Schematic illustrating breakpoints in intron 17 of FGFR3 and intron 10 of TACC3, (B) Confirmation of translocation breakpoint using PCR and Sanger sequencing, (C) Predicted mRNA transcript and FGFR3-TACC3 fusion protein.

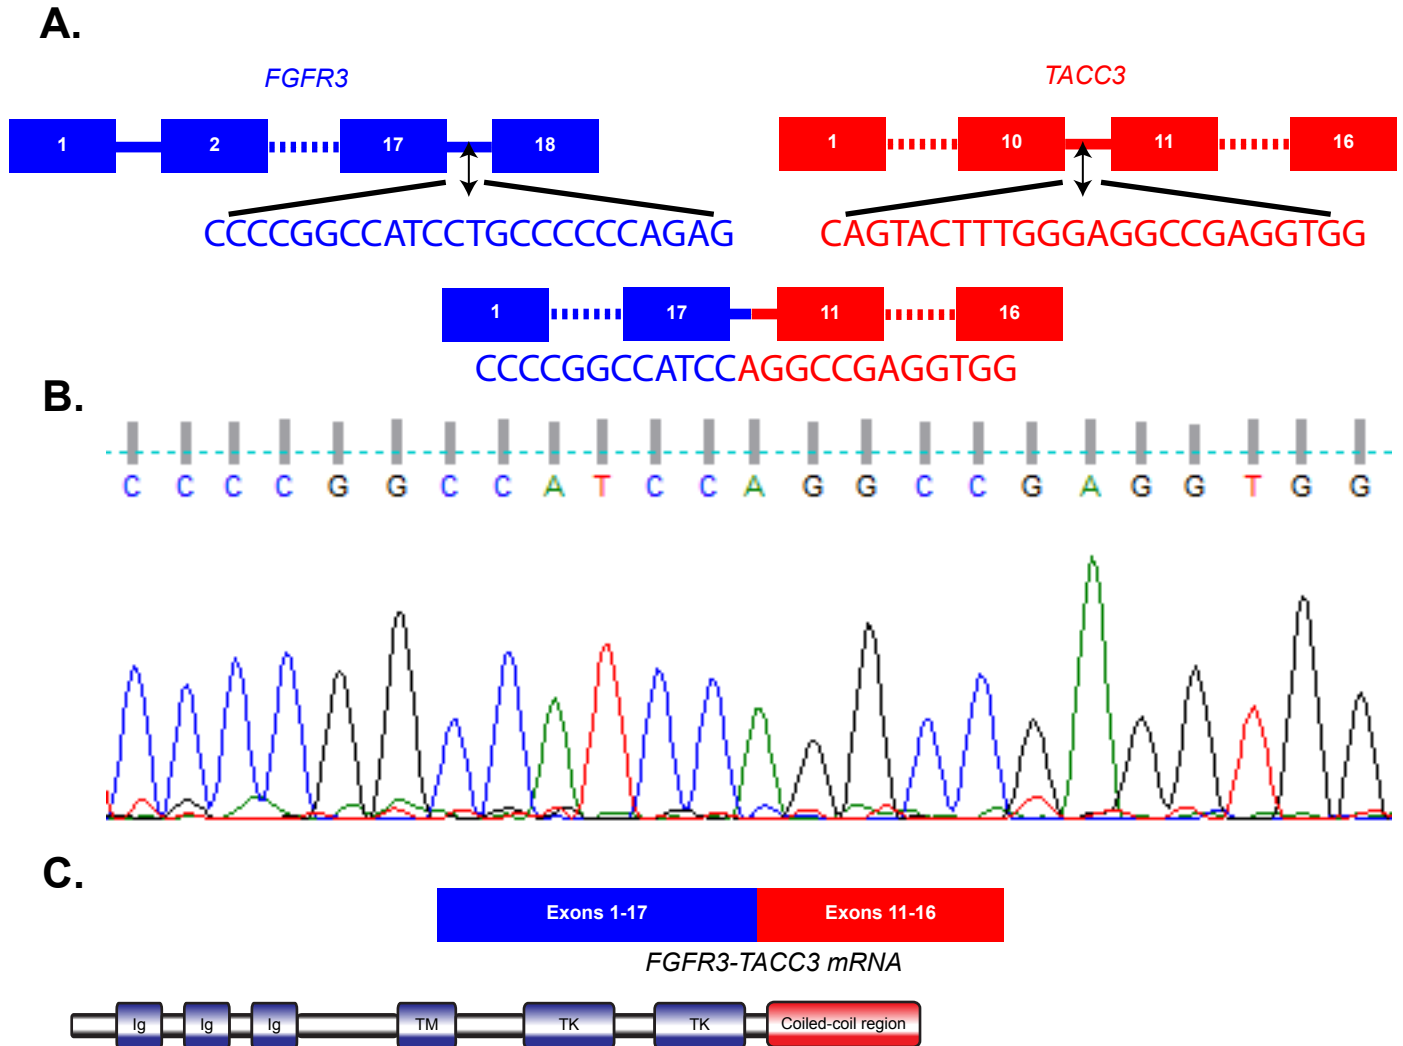

Supplement: NIHMS711446-supplement-2.pdf [file NIHMS711446-supplement-2.pdf]
