# Supplementary material
Source: PubMed Central journal article supplement (PMC4675454)

**Supplementary Figure S3.** Oncoprint of the (A) RTK/RAS/MAPK and (B) p53 pathways showing mutual exclusivity.

**RTK/RAS/MAPK Pathway**

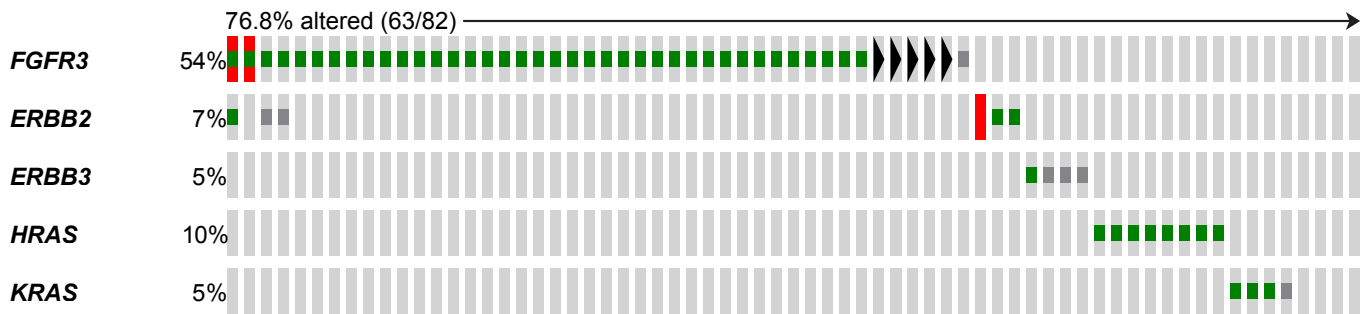

**p53 Pathway**

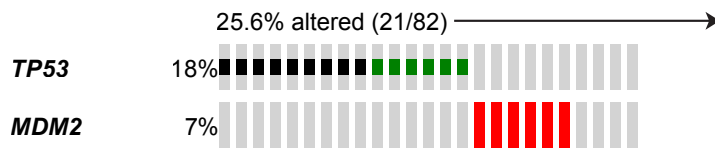

Supplement: NIHMS711446-supplement-3.pdf [file NIHMS711446-supplement-3.pdf]
